# Supplementary material
Source: publisher site journal article supplement (https://www.dovepress.com/article/532884)

**Supplementary Material**

**Table S1. Full search strategy**

| #1 | Interval Breast Cancer |
| --- | --- |
| #2 | “Interval cancer” AND ("Breast Neoplasms"[Mesh] OR breast[Title/Abstract]) |
| #3 | #1 OR #2 |
| #4 | ("Early Detection of Cancer"[Mesh]) OR ("Mass Screening"[Mesh] OR screen* [Title/Abstract]) |
| #5 | "mammogra*"[Title/Abstract] OR "Ultrasound"[Title/Abstract] OR "Tomosynthesis"[Title/Abstract] OR "molecular breast imaging"[Title/Abstract] OR "artificial intelligence"[Title/Abstract] OR “contrast enhanced spectral mammogram*"[Title/AbstractOR "MRI"[Title/Abstract] OR "magnetic resonance imaging"[Title/Abstract] OR "Molecular Imaging"[MeSH Terms] OR "adjunct*"[Title/Abstract] OR "supplement*"[Title/Abstract] |
| #6 | "Mammography"[Mesh] OR "Artificial Intelligence"[Mesh] |
| #7 | Interval*[Title/Abstract] OR screening interval*[Title/Abstract] OR year interval*[Title/Abstract]  OR frequency[Title/Abstract] OR regular screening [Title/Abstract]  OR timing[Title/Abstract]  OR annual*[Title/Abstract] OR biennial*[Title/Abstract] OR triennial*[Title/Abstract] |
| #8 | #5 OR #6 OR #7 |
| #9 | #3 AND #4 AND #8 |

**Table S2a. Summary table of quality assessment using the Newcastle-Ottawa Score (cohort studies)**

| **Study** | **Selection** | | | | **Comparability** | **Outcome** | | | **AHRQ standards** |
| --- | --- | --- | --- | --- | --- | --- | --- | --- | --- |
| Representativeness of exposed cohort | Selection of the non-exposed cohort | Ascertainment of exposure | Demonstration that outcome of interest was not present at start of study | Comparability of cohorts on the basis of the design or analysis | Assessment of outcome | Was follow-up long enough for outcomes to occur | Adequacy of follow up of cohort |
| Lång et al 202124 | ★ | ★ | ★ | ★ | ★ | ★ | ★ | ★ | Good |
| Mao et al 202131 | ★ | ★ | ★ | ★ | ★ | ★ | ★ | ★ | Good |
| Marinovich et al 202311 | ★ | ★ | ★ | ★ | ★ | ★ | ★ | ★ | Good |
| McDonald et al 201634 | ★ | ★ | ★ | ★ | ★ | ★ | ★ | ★ | Good |
| Moorman et al 202139 | ★ | ★ | ★ | ★ | ★ | ★ | ★ | ★ | Good |
| Skaane et al 201825 | ★ | ★ | ★ | ★ | ★ | ★ |  | ★ | Good |
| Tutar et al 202015 | ★ | ★ | ★ | ★ | ★ | ★ | ★ | ★ | Good |
| Wai et al 200512 |  | ★ | ★ | ★ | ★ | ★ | ★ | ★ | Good |
| Winter et al 202035 | ★ | ★ | ★ | ★ | ★ | ★ | ★ | ★ | Good |
| Bernardi et al 202017 | ★ | ★ | ★ | ★ | ★ | ★ | ★ | ★ | Good |
| Chiarelli et al 201513 | ★ | ★ | ★ | ★ | ★ | ★ | ★ | ★ | Good |
| Corsetti et al 201120 | ★ | ★ | ★ |  | ★ | ★ | ★ | ★ | Good |
| Dembrower et al 20207 | ★ | ★ | ★ | ★ | ★ | ★ | ★ | ★ | Good |
| Friedewald et al 202236 | ★ | ★ | ★ | ★ | ★ | ★ | ★ | ★ | Good |
| Hinton et al 201933 | ★ | ★ | ★ | ★ | ★ | ★ | ★ |  | Good |
| Hofvind et al 200814 | ★ |  | ★ | ★ | ★ | ★ | ★ | ★ | Good |
| Houssami et al 201818 | ★ | ★ | ★ | ★ | ★ | ★ | ★ | ★ | Good |
| Houssami et al 202343 | ★ | ★ | ★ | ★ | ★ | ★ | ★ | ★ | Good |
| Kerlikowske et al 20226 | ★ | ★ | ★ | ★ | ★ | ★ | ★ | ★ | Good |
| Koch et al 202323 | ★ | ★ | ★ | ★ | ★ | ★ | ★ | ★ | Good |
| Larsen et al 202224 | ★ | ★ | ★ | ★ | ★ | ★ | ★ | ★ | Good |
| Larsen et al 202328 | ★ | ★ | ★ | ★ | ★ | ★ | ★ | ★ | Good |
| Lee et al 201938 | ★ | ★ | ★ | ★ | ★ | ★ | ★ | ★ | Good |
| Johnson et al 202130 | ★ | ★ | ★ | ★ | ★ | ★ | ★ | ★ | Good |
| Bahl et al 201837 | ★ | ★ | ★ | ★ | ★ | ★ | ★ | ★ | Good |
| Zackrisson et al 201826 | ★ | ★ | ★ | ★ | ★ | ★ | ★ | ★ | Good |

**Table S2b. Summary table of quality assessment using the revised Cochrane Risk of Bias tool (randomised controlled trials)**


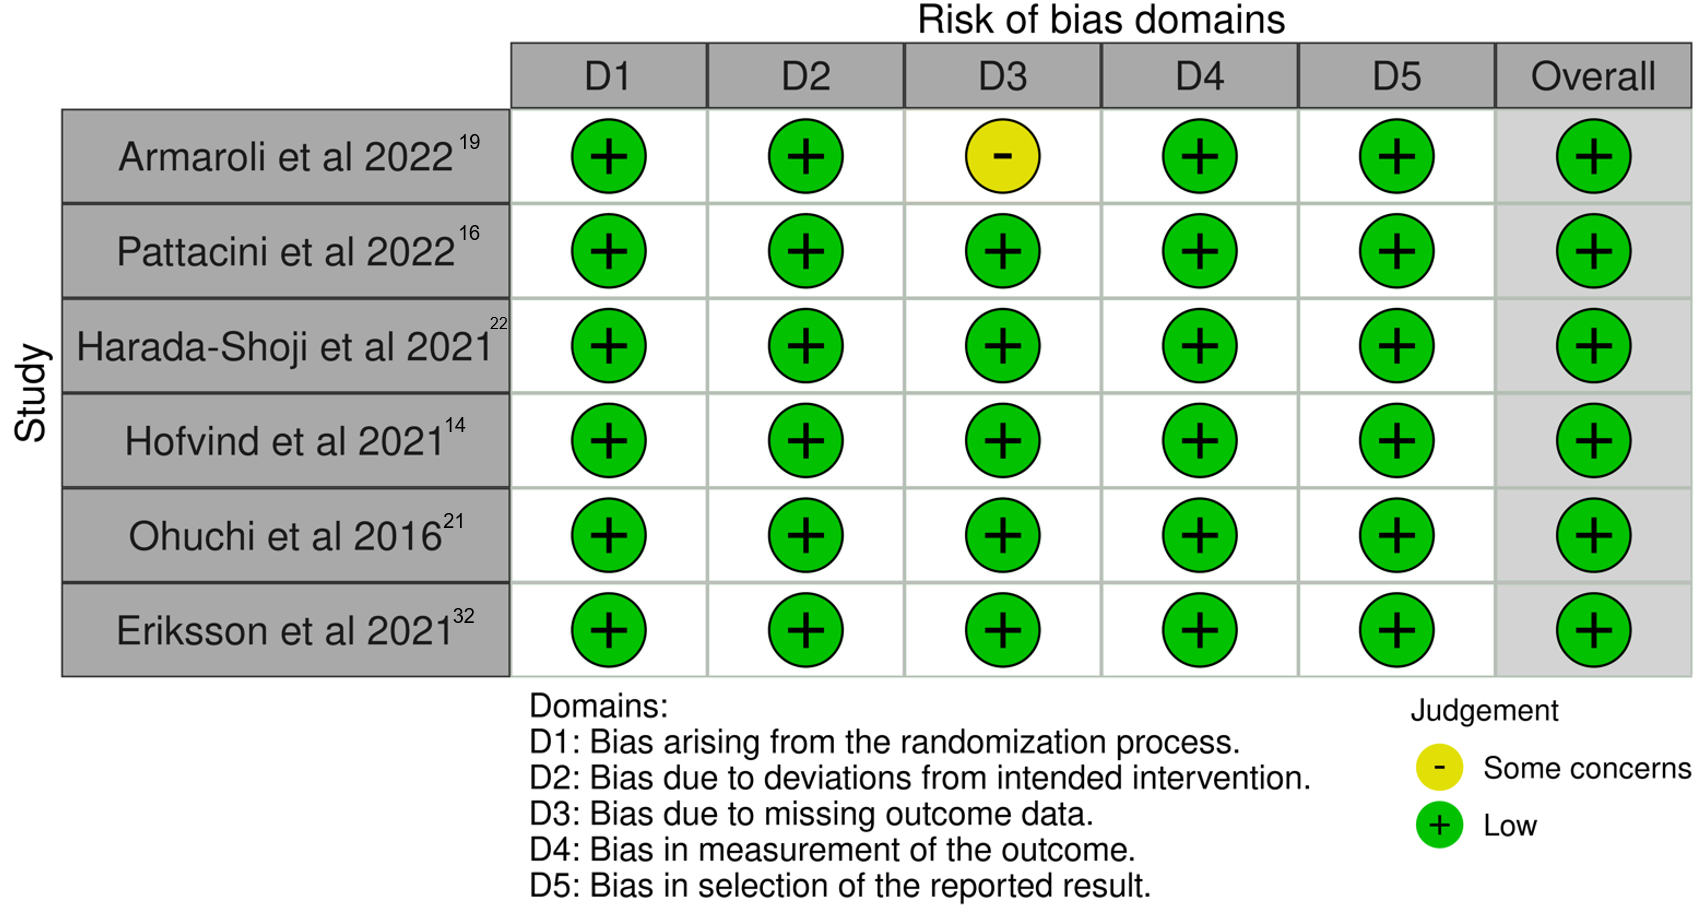

Supplement: Supplementary file 1 [file 532884%20Supplementary%20file.docx]
